# Supplementary material
Source: PubMed Central journal article supplement (PMC1421501)
Supplement: nar_34_6_1745__1.pdf [file nar_34_6_1745__1.pdf]

Supplementary table 1. cDNA microarray analysis of 1A3 cells +/- 4-OHT

| <u>A_mean</u> | <u>M_mean</u> | <u>Fold change</u> | <u>Direction</u> | <u>GenBank.ID</u> | <u>Symbol</u> |   |
|---------------|---------------|--------------------|------------------|-------------------|---------------|---|
| 12,90         | 4,717084644   | 26,3up             |                  | H29227            | ZDHHC23       |   |
| 9,99          | -4,664965429  | 25,4down           |                  | T89094            |               | 0 |
| 9,54          | 4,554881857   | 23,5up             |                  | H94262            | EPB41L4B      |   |
| 10,01         | -4,46922771   | 22,1down           |                  | H29485            | SSB           |   |
| 10,93         | 4,430275642   | 21,6up             |                  | N35592            | Ells1         |   |
| 9,78          | 4,419887119   | 21,4up             |                  | N75346            | CRTAP         |   |
| 8,01          | 3,92899057    | 20,7up             |                  | N54401            | RRAGD         |   |
| 9,51          | 4,247034725   | 19,0up             |                  | AA464544          | LMO2          |   |
| 10,52         | -4,229125404  | 18,8down           |                  | AA485373          | VMP1          |   |
| 11,69         | 4,124762831   | 17,4up             |                  | AA022886          | PITPNC1       |   |
| 10,74         | 4,112637174   | 17,3up             |                  | H10417            | ANKH          |   |
| 10,17         | 3,986959752   | 15,9up             |                  | N64519            |               | 0 |
| 8,85          | 3,916563662   | 15,1up             |                  | H24347            | FLJ30834      |   |
| 9,48          | 3,768769741   | 13,6up             |                  | H18428            |               | 0 |
| 10,46         | 3,599108367   | 12,1up             |                  | AA111969          | CD83          |   |
| 10,02         | -3,554595635  | 11,8down           |                  | AA938563          | CCL2          |   |
| 8,74          | 3,548318103   | 11,7up             |                  | AA131299          | CaMKIINalpha  |   |
| 9,93          | 3,501590561   | 11,3up             |                  | H45668            |               | 0 |
| 9,02          | 3,03753917    | 10,7up             |                  | AA088458          | C9orf140      |   |
| 7,81          | 2,967111719   | 10,5up             |                  | AA427619          |               |   |
| 11,98         | 3,318889828   | 10,0up             |                  | AA402345          | CCND3         |   |
| 9,40          | 3,303186088   | 9,9up              |                  | R56046            | GNAZ          |   |
| 8,37          | 3,216610347   | 9,3up              |                  | AA150828          | MAP3K5        |   |
| 9,63          | 3,195023885   | 9,2up              |                  | H22854            |               | 0 |
| 10,01         | -3,190242294  | 9,1down            |                  | AA425102          | CCL2          |   |
| 8,96          | -3,167914937  | 9,0down            |                  | H09105            | RARB          |   |
| 11,90         | -3,149556754  | 8,9down            |                  | H88599            |               | 0 |
| 9,32          | 3,112841415   | 8,7up              |                  | R92495            | DLX4          |   |
| 9,07          | 3,075184576   | 8,4up              |                  | N92873            | IL17D         |   |
| 11,58         | 3,034774778   | 8,2up              |                  | N70759            |               | 0 |
| 11,63         | 3,024694539   | 8,1up              |                  | R53428            | ABCA5         |   |
| 11,52         | 3,019711045   | 8,1up              |                  | AA621188          | DKFZP564D166  |   |
| 9,91          | 3,008583859   | 8,0up              |                  | AA447985          | GKAP1         |   |
| 12,51         | 3,006177976   | 8,0up              |                  | H90879            | MGC8974       |   |
| 8,70          | 2,992597529   | 8,0up              |                  | AA469975          | SLC25A29      |   |
| 11,63         | -2,97796362   | 7,9down            |                  | AA495790          | RHOB          |   |
| 9,81          | 2,977783227   | 7,9up              |                  | AA427722          | HIP1          |   |
| 9,15          | -2,969928619  | 7,8down            |                  | N36402            | MBNL2         |   |
| 9,49          | 2,94679431    | 7,7up              |                  | AA459363          | RNPC1         |   |
| 11,01         | 2,919211521   | 7,6up              |                  | AA436008          | ACVR1B        |   |
| 10,06         | 2,915548306   | 7,5up              |                  | W63749            | BCL2          |   |
| 9,91          | 2,852610233   | 7,4up              |                  | AA443688          | GCH1          |   |
| 9,63          | 2,88840018    | 7,4up              |                  | AA166617          |               | 0 |
| 10,58         | 2,883401809   | 7,4up              |                  | R96455            |               | 0 |
| 10,84         | 2,88064422    | 7,4up              |                  | H23470            | TLK2          |   |
| 11,65         | 2,874797903   | 7,3up              |                  | AA663981          | IGHG1         |   |
| 10,14         | 2,868104282   | 7,3up              |                  | AA625890          | MYO6          |   |
| 10,47         | 2,866110496   | 7,3up              |                  | N30327            | LOC283464     |   |
| 11,23         | 2,865539744   | 7,3up              |                  | H15409            | CAMSAP1       |   |
| 11,91         | 2,861883741   | 7,3up              |                  | N72115            | CDKN2C        |   |
| 10,00         | 2,851520525   | 7,2up              |                  | N68463            | AKAP12        |   |

|       |              |         |          |           |   |
|-------|--------------|---------|----------|-----------|---|
| 8,60  | 2,837496603  | 7,1up   | AA432143 | CITED1    |   |
| 9,33  | 2,833210406  | 7,1up   | AA070495 | PRKAG1    |   |
| 9,75  | -2,817069294 | 7,0down | R67336   |           | 0 |
| 10,77 | 2,813757216  | 7,0up   | H47327   | TACC1     |   |
| 8,89  | 2,373009072  | 7,0up   | N91003   | ELOVL7    |   |
| 10,23 | -2,806445084 | 7,0down | W74748   | ZCCHC9    |   |
| 10,13 | -2,804893595 | 7,0down | H07072   |           | 0 |
| 11,68 | -2,801022403 | 7,0down | AA456008 | AF1Q      |   |
| 11,00 | 2,796561274  | 6,9up   | AA279429 | ECE1      |   |
| 9,25  | 2,793693446  | 6,9up   | R56045   |           | 0 |
| 10,21 | 2,78035913   | 6,9up   | H09959   | CHKA      |   |
| 10,14 | 2,768244414  | 6,8up   | AA485369 | LOC157378 |   |
| 11,89 | 2,757885876  | 6,8up   | H17520   | LSM11     |   |
| 9,93  | 0,618294166  | 6,7up   | AA463493 | TEX264    |   |
| 9,82  | 2,735065859  | 6,7up   | N68193   | GAB1      |   |
| 8,59  | -0,630202107 | 6,6up   | N28258   | FLJ10099  |   |
| 9,77  | 2,719379615  | 6,6up   | R32334   | FBXL11    |   |
| 11,29 | 2,710367482  | 6,5up   | W72167   | TM4SF9    |   |
| 8,02  | #DIV/0!      | 6,5up   | H18956   |           | 0 |
| 10,47 | 2,675446162  | 6,4up   | H71857   |           | 0 |
| 9,39  | 2,671593372  | 6,4up   | N20798   | KIT       |   |
| 9,44  | -2,669536639 | 6,4down | AA460152 | PLK2      |   |
| 12,03 | 2,662713324  | 6,3up   | AA478543 | AKAP12    |   |
| 9,43  | 2,656571838  | 6,3up   | N58144   | SPAG9     |   |
| 10,46 | 2,655202713  | 6,3up   | R96595   | GAB1      |   |
| 9,29  | 2,631444245  | 6,2up   | AA454971 | SLK       |   |
| 10,79 | 2,624333868  | 6,2up   | N64794   | MLR2      |   |
| 10,67 | -2,623474309 | 6,2down | W55968   | MBIP      |   |
| 11,81 | -2,619870145 | 6,1down | AA598817 | PRAME     |   |
| 9,91  | 2,611943318  | 6,1up   | N74018   |           | 0 |
| 9,73  | 2,608712562  | 6,1up   | ai07731  |           | 0 |
| 10,21 | 2,602580643  | 6,1up   | R38044   | TFAP2A    |   |
| 8,17  | 2,104049003  | 6,1up   | R33852   |           | 0 |
| 13,06 | 2,597120986  | 6,1up   | u35290   |           | 0 |
| 9,77  | -2,593909703 | 6,0down | N75438   | TAF1      |   |
| 12,93 | 2,586497995  | 6,0up   | R78541   | HSHIN1    |   |
| 11,95 | -2,568863802 | 5,9down | AA490996 | IFI16     |   |
| 8,98  | 2,554318247  | 5,9up   | N68424   | GLUD1     |   |
| 11,60 | -2,547495735 | 5,8down | N70463   | BTG1      |   |
| 9,45  | 2,536515487  | 5,8up   | AA001614 |           | 0 |
| 8,81  | -2,52927769  | 5,8down | AA598794 | CTGF      |   |
| 11,14 | 2,528619198  | 5,8up   | AA487218 | NUDT3     |   |
| 9,88  | -2,511133122 | 5,7down | N49922   | ZFHX4     |   |
| 11,48 | 2,495519253  | 5,6up   | AA419620 | FGFR3     |   |
| 8,77  | 2,487291553  | 5,6up   | N55085   | CNKSR2    |   |
| 11,54 | 2,481386247  | 5,6up   | H10009   |           | 0 |
| 9,31  | 2,479170617  | 5,6up   | AA454143 | USP4      |   |
| 11,80 | 2,478799274  | 5,6up   | R91264   | LPGAT1    |   |
| 10,95 | 2,468480219  | 5,5up   | AA450123 | ENO2      |   |
| 12,81 | 2,465864676  | 5,5up   | R43550   | GPR161    |   |
| 9,61  | -2,463357544 | 5,5down | AA041482 | F2RL2     |   |
| 8,70  | 2,461505106  | 5,5up   | AA432271 | PRKAB1    |   |
| 9,54  | 2,461128512  | 5,5up   | N52875   | KIAA1450  |   |
| 11,08 | 2,460017901  | 5,5up   | W95389   | SHD1      |   |
| 11,17 | 2,459917806  | 5,5up   | AA454193 | RYBP      |   |

|       |              |         |          |           |   |
|-------|--------------|---------|----------|-----------|---|
| 7,60  | 2,457034308  | 5,5up   | AA460012 |           |   |
| 9,15  | 2,456814719  | 5,5up   | H99738   | RRAGD     |   |
| 8,62  | 2,455806908  | 5,5up   | T97479   | OSBPL6    |   |
| 9,90  | -2,453609253 | 5,5down | R44953   | PGBD3     |   |
| 8,19  | 3,976902181  | 5,5up   | AA443147 | KIAA0582  |   |
| 10,35 | 2,451829988  | 5,5up   | AA017175 | GLUD1     |   |
| 9,76  | 2,449250879  | 5,5up   | H09759   | T1        |   |
| 9,81  | 2,448796927  | 5,5up   | AA454823 | HNRPU     |   |
| 10,40 | -2,447053737 | 5,5down | N67039   | CDK6      |   |
| 12,55 | 2,441673348  | 5,4up   | R38198   | QDPR      |   |
| 10,87 | -2,439264965 | 5,4down | AA411850 | CENPE     |   |
| 10,65 | 2,432829163  | 5,4up   | H20847   | SSX2IP    |   |
| 10,78 | -2,431370009 | 5,4down | R83270   |           | 0 |
| 11,10 | 2,429352062  | 5,4up   | W32474   | RAP2A     |   |
| 8,92  | 2,412891913  | 5,3up   | T54121   |           | 0 |
| 10,67 | 2,530673795  | 5,3up   | AA136060 | RNF159    |   |
| 10,71 | 2,408184007  | 5,3up   | N69286   | C1orf21   |   |
| 10,44 | 2,40414381   | 5,3up   | AA425299 | SLC9A3R1  |   |
| 11,28 | 2,404029998  | 5,3up   | R44837   |           | 0 |
| 9,52  | 2,395797163  | 5,3up   | AA457115 | KIAA1522  |   |
| 8,14  | 2,110088873  | 5,2up   | W32409   | SLC16A10  |   |
| 9,87  | 2,384380921  | 5,2up   | W93024   | LOC401321 |   |
| 10,89 | 2,380022548  | 5,2up   | H22936   | RAB4A     |   |
| 14,00 | -2,378442691 | 5,2down | u30986   |           | 0 |
| 10,74 | 2,37642534   | 5,2up   | N73916   |           | 0 |
| 8,96  | -2,516087045 | 5,2down | AA115076 | CITED2    |   |
| 8,51  | 1,628853753  | 5,2up   | AA088258 |           | 0 |
| 9,17  | 2,365613089  | 5,2up   | N80848   | RAB9B     |   |
| 8,68  | 2,361962387  | 5,1up   | AA460298 | C14orf45  |   |
| 13,98 | 2,361724499  | 5,1up   | AA430744 | EZH2      |   |
| 8,52  | 2,770741054  | 5,1up   | R43873   | MGC35048  |   |
| 9,92  | 2,355998314  | 5,1up   | R44018   | CRY1      |   |
| 10,29 | -2,353326603 | 5,1down | H16796   | KCTD10    |   |
| 12,93 | -2,350576044 | 5,1down | H20558   | ARL6IP    |   |
| 9,24  | 2,348229653  | 5,1up   | AA433898 | DLGAP4    |   |
| 8,50  | 0,116037619  | 5,1up   | T87224   | FLJ21963  |   |
| 11,30 | -2,320102124 | 5,0down | R69356   | AFAP      |   |
| 12,11 | 2,319022565  | 5,0up   | R59165   | PPP2R5A   |   |
| 10,74 | -2,318428916 | 5,0down | R93185   |           | 0 |
| 10,74 | -2,310611468 | 5,0down | AA135824 | FLJ11184  |   |
| 10,45 | 2,309674489  | 5,0up   | AA488336 | DRG1      |   |
| 8,15  | 1,941125055  | 5,0up   | W86196   |           | 0 |
| 8,66  | 2,307644101  | 5,0up   | H38799   | FLJ20701  |   |
| 8,74  | 2,303387314  | 4,9up   | W37447   |           | 0 |
| 9,62  | 2,287289049  | 4,9up   | H77399   | PKNOX1    |   |
| 10,24 | 2,279944244  | 4,9up   | R26919   | DSCR1L2   |   |
| 10,10 | 2,270384898  | 4,8up   | AA151303 |           | 0 |
| 9,23  | 2,267754366  | 4,8up   | R62813   | MYCL1     |   |
| 8,78  | 2,266228174  | 4,8up   | H29050   | RAB9B     |   |
| 11,69 | -2,263972534 | 4,8down | N20106   | CART1     |   |
| 9,21  | 2,262821583  | 4,8up   | N95011   | PLEKHA1   |   |
| 8,37  | 2,237118384  | 4,7up   | R69244   |           | 0 |
| 8,28  | 2,231385987  | 4,7up   | AA454756 | LOC112868 |   |
| 9,81  | 2,230360409  | 4,7up   | N50962   | WDR8      |   |
| 10,83 | 2,224589833  | 4,7up   | AA479933 | C1orf41   |   |

|       |              |          |          |           |   |
|-------|--------------|----------|----------|-----------|---|
| 10,27 | -2,224310525 | 4,7 down | R22625   | CDK7      |   |
| 9,61  | -2,223831922 | 4,7 down | AA700556 | CSTF3     |   |
| 12,56 | 2,220786963  | 4,7 up   | H29199   | CASP3     |   |
| 9,63  | -2,077985686 | 4,6 down | H19217   |           | 0 |
| 10,89 | -2,211582451 | 4,6 down | AA495944 |           | 0 |
| 9,37  | 2,193297002  | 4,6 up   | N45221   | HIPK2     |   |
| 8,06  | 2,18885237   | 4,6 up   | N53665   | C1GALT1   |   |
| 9,62  | -2,183291391 | 4,5 down | R37224   |           | 0 |
| 10,36 | 2,172214494  | 4,5 up   | T51851   | HNRPU     |   |
| 11,61 | 2,168637235  | 4,5 up   | AA458992 | FVT1      |   |
| 9,31  | 2,15499888   | 4,5 up   | R92717   | KMO       |   |
| 10,65 | -2,153496261 | 4,4 down | H68664   | PBX1      |   |
| 8,37  | 2,152396879  | 4,4 up   | H20816   | ZNRF2     |   |
| 10,09 | 2,150585825  | 4,4 up   | N70072   |           | 0 |
| 9,85  | 2,142288034  | 4,4 up   | T87515   | BMI1      |   |
| 12,74 | 2,141993176  | 4,4 up   | W93520   | MAK3      |   |
| 11,16 | 2,135709268  | 4,4 up   | R58970   |           | 0 |
| 12,24 | 2,13489851   | 4,4 up   | T96608   | MGC5576   |   |
| 10,48 | -2,13459152  | 4,4 down | T62638   | GMRP-1    |   |
| 9,14  | 2,130008138  | 4,4 up   | H53602   | SLC25A25  |   |
| 6,96  | -0,041760804 | 4,4 down | R56149   |           |   |
| 9,79  | 2,121710154  | 4,4 up   | AA464694 | MAP3K1    |   |
| 11,09 | 2,120061976  | 4,3 up   | AA464526 | IL1R1     |   |
| 10,45 | 2,115304608  | 4,3 up   | W95389   | SHD1      |   |
| 11,79 | 2,112322579  | 4,3 up   | R27006   |           | 0 |
| 9,87  | 2,110634255  | 4,3 up   | AA070487 | MGC34132  |   |
| 9,91  | -2,109424802 | 4,3 down | R11630   | WDR26     |   |
| 10,33 | 2,107017096  | 4,3 up   | H14514   | KIF21B    |   |
| 10,58 | 2,09744788   | 4,3 up   | AA010492 | MBD4      |   |
| 12,29 | 2,095842562  | 4,3 up   | R76554   | CALM1     |   |
| 11,07 | 2,085619207  | 4,2 up   | N20593   | MAK3      |   |
| 9,23  | 2,082541485  | 4,2 up   | R40970   | OACT2     |   |
| 10,60 | 2,078620074  | 4,2 up   | AA122022 | EML4      |   |
| 9,67  | 2,077391083  | 4,2 up   | R63623   | DYRK2     |   |
| 10,64 | 2,076789761  | 4,2 up   | AA457026 | RCOR1     |   |
| 11,82 | 2,07378593   | 4,2 up   | AA457374 |           | 0 |
| 11,49 | 2,072383076  | 4,2 up   | R83876   |           | 0 |
| 9,26  | 3,135625077  | 4,2 up   | R14959   | NIN       |   |
| 11,22 | 2,060064772  | 4,2 up   | AA187148 | CBFB      |   |
| 9,40  | -2,058317274 | 4,2 down | T89996   |           | 0 |
| 9,54  | 2,054400086  | 4,2 up   | W49672   |           | 0 |
| 10,08 | 2,052503002  | 4,1 up   | AA262205 | DGKZ      |   |
| 10,81 | 2,051663986  | 4,1 up   | AA281064 | FGFR1     |   |
| 11,89 | 2,050923359  | 4,1 up   | R22335   | LOC284018 |   |
| 9,06  | 2,045575196  | 4,1 up   | AA195636 |           | 0 |
| 10,31 | 2,043944921  | 4,1 up   | AA029042 | SIAH2     |   |
| 12,06 | 2,04247641   | 4,1 up   | AA404280 | WRB       |   |
| 10,82 | 2,041308877  | 4,1 up   | AA521347 | JJAZ1     |   |
| 9,60  | -2,040947936 | 4,1 down | T62844   | MOSPD1    |   |
| 9,65  | 2,038831432  | 4,1 up   | AA011379 | PDCD8     |   |
| 11,31 | -2,038747937 | 4,1 down | T97762   | IFRD1     |   |
| 11,03 | 2,035113458  | 4,1 up   | AA115535 | SOCS4     |   |
| 8,41  | 2,032505874  | 4,1 up   | AA133167 | KIAA1644  |   |
| 11,61 | 2,028856613  | 4,1 up   | AA404288 | MASA      |   |
| 9,34  | -2,026383502 | 4,1 down | N29639   | CMAH      |   |

|       |              |         |          |           |   |
|-------|--------------|---------|----------|-----------|---|
| 11,23 | 2,025324474  | 4,1up   | AA457717 | ATP6V0B   |   |
| 8,54  | 2,0220288    | 4,1up   | R66896   |           | 0 |
| 10,70 | 2,019474763  | 4,1up   | AA478036 | BMI1      |   |
| 11,17 | 2,017681446  | 4,0up   | H59114   | CARF      |   |
| 12,01 | 2,016591729  | 4,0up   | N33620   |           | 0 |
| 14,09 | 2,01654358   | 4,0up   | N52496   | BTG3      |   |
| 8,13  | 2,014415304  | 4,0up   | R52949   |           | 0 |
| 9,24  | 2,012657711  | 4,0up   | N59441   |           | 0 |
| 10,04 | 2,012189445  | 4,0up   | AA055489 |           | 0 |
| 10,21 | -2,010641307 | 4,0down | AA430052 | DHX36     |   |
| 9,74  | 2,010366676  | 4,0up   | T62575   | TRIM33    |   |
| 8,73  | -0,121851468 | 4,0down | AA447658 | NEO1      |   |
| 9,74  | 2,001800715  | 4,0up   | AA459293 | TMEM23    |   |
| 13,03 | 2,001332116  | 4,0up   | H20743   | CDC34     |   |
| 12,83 | 2,000143874  | 4,0up   | W90705   | BMI1      |   |
| 10,67 | 1,999859836  | 4,0up   | R26706   | RBMX      |   |
| 11,45 | 1,997778369  | 4,0up   | H56028   | EGLN1     |   |
| 12,25 | -1,996989507 | 4,0down | AA488177 | DCTN4     |   |
| 10,42 | 1,995916737  | 4,0up   | W92417   | COL21A1   |   |
| 9,33  | 1,993510671  | 4,0up   | AA028921 | LOC153561 |   |
| 12,99 | -0,06832719  | 4,0down | N21407   | PC4       |   |
| 10,21 | 1,986516145  | 4,0up   | H72932   |           | 0 |
| 7,88  | -0,182754575 | 4,0down | AA609982 |           |   |
| 10,97 | 1,979122719  | 3,9up   | H18080   | ZDHHC18   |   |
| 7,70  | 1,978926322  | 3,9up   | H22842   |           |   |
| 8,83  | 1,970452714  | 3,9up   | H69695   |           | 0 |
| 9,93  | -1,96934032  | 3,9down | T61899   |           | 0 |
| 9,47  | -2,41611095  | 3,9down | AA464578 | ARHGEF2   |   |
| 11,71 | 1,967567117  | 3,9up   | H85476   | KIAA1340  |   |
| 9,36  | 1,967043712  | 3,9up   | H05489   |           | 0 |
| 9,41  | 1,962530242  | 3,9up   | N63567   | PDK3      |   |
| 10,99 | 1,958411583  | 3,9up   | AA431475 | TMEFF1    |   |
| 9,50  | 2,850681853  | 3,9up   | N63476   | PXK       |   |
| 8,99  | 1,958126634  | 3,9up   | AA461509 |           | 0 |
| 12,31 | -1,950835223 | 3,9down | AA460969 | MAP3K7    |   |
| 11,71 | 1,947953907  | 3,9up   | H29604   | WBSCR16   |   |
| 8,39  | 1,937563061  | 3,8up   | H17950   | HSPA12A   |   |
| 12,25 | 1,936848037  | 3,8up   | N89756   | SLK       |   |
| 12,25 | 1,928332493  | 3,8up   | N62620   | KCNK1     |   |
| 11,15 | 1,927947068  | 3,8up   | AA120777 | BTAF1     |   |
| 11,50 | -1,925495007 | 3,8down | AA477514 | TSNAX     |   |
| 10,27 | -1,924765278 | 3,8down | W02116   | WDR42A    |   |
| 12,81 | 1,923515109  | 3,8up   | R42530   |           | 0 |
| 9,13  | 1,923174967  | 3,8up   | AA488062 | HSPC159   |   |
| 12,32 | 1,920525662  | 3,8up   | R44048   | CHPT1     |   |
| 13,27 | 1,918627407  | 3,8up   | H24301   | RBBP8     |   |
| 11,52 | 1,918530842  | 3,8up   | AA417881 | BLMH      |   |
| 10,61 | -1,916803114 | 3,8down | AA430625 | DPYD      |   |
| 10,14 | 1,911031777  | 3,8up   | AA458473 | DHX8      |   |
| 11,54 | 1,909593806  | 3,8up   | H09601   | ZNF496    |   |
| 10,62 | -1,906775621 | 3,7down | R69622   | CGI-141   |   |
| 8,68  | 1,902048365  | 3,7up   | AA458969 | SRPRB     |   |
| 10,18 | 1,901822363  | 3,7up   | AA455925 | FHL1      |   |
| 10,25 | -1,901617137 | 3,7down | AA447984 | C14orf119 |   |
| 10,79 | 1,90114711   | 3,7up   | AA400022 | PDXP      |   |

|       |              |         |          |           |   |
|-------|--------------|---------|----------|-----------|---|
| 12,86 | 1,897233505  | 3,7up   | N70528   | YTHDF2    |   |
| 10,96 | -1,896729887 | 3,7down | H17513   | HSPA1L    |   |
| 9,58  | 1,894412862  | 3,7up   | R32858   |           | 0 |
| 9,02  | 1,891528342  | 3,7up   | AA029331 | LCHN      |   |
| 9,44  | -1,889980896 | 3,7down | R83224   |           | 0 |
| 9,14  | -1,889884257 | 3,7down | T95274   |           | 0 |
| 9,90  | 1,885630178  | 3,7up   | AA024449 | VKORC1L1  |   |
| 12,21 | 1,883397237  | 3,7up   | T49355   | CHPT1     |   |
| 8,75  | 1,881451139  | 3,7up   | R36669   | FLJ90013  |   |
| 10,27 | 1,87987089   | 3,7up   | AA034213 | ITM2C     |   |
| 9,60  | 1,87892658   | 3,7up   | R69354   | INPP5F    |   |
| 8,77  | 1,878896636  | 3,7up   | R30957   | FLJ13855  |   |
| 8,35  | 1,869596754  | 3,7up   | H10344   | TIGD3     |   |
| 9,65  | 1,856854188  | 3,6up   | AA149637 | TBL1X     |   |
| 10,74 | -1,058250416 | 3,6down | H48470   | GYPC      |   |
| 9,72  | 1,854509444  | 3,6up   | N66278   | JUND      |   |
| 9,47  | 1,853653837  | 3,6up   | N92415   | NAPE-PLD  |   |
| 13,09 | 1,853556932  | 3,6up   | AA131526 | FLJ14668  |   |
| 10,40 | -1,850364634 | 3,6down | AA243749 | DDR2      |   |
| 11,26 | -1,846084676 | 3,6down | T53792   | COPB2     |   |
| 8,66  | 1,845258282  | 3,6up   | H08595   |           | 0 |
| 10,24 | -1,843246288 | 3,6down | AA148524 | DDR2      |   |
| 11,55 | -1,839259592 | 3,6down | R44538   |           | 0 |
| 11,72 | 1,833430351  | 3,6up   | AA431986 | BBX       |   |
| 11,46 | -1,83128879  | 3,6down | N47469   | ZNF281    |   |
| 9,26  | -1,831188628 | 3,6down | AA009755 | LOC115294 |   |
| 10,99 | 1,831014616  | 3,6up   | R64600   | OSBPL3    |   |
| 9,42  | -1,823911922 | 3,5down | AA427625 |           | 0 |
| 11,21 | -1,822799398 | 3,5down | R63922   |           | 0 |
| 12,46 | 1,819392873  | 3,5up   | AA599008 | TLK2      |   |
| 11,06 | -1,815464353 | 3,5down | AA186873 | MGC2714   |   |
| 13,81 | 1,813242236  | 3,5up   | AA411440 | VIL2      |   |
| 10,45 | 1,812861138  | 3,5up   |          | IGFBP4    |   |
| 9,62  | -1,809427435 | 3,5down | N54456   | ARMCX3    |   |
| 11,52 | 1,804772894  | 3,5up   | AA629686 | EED       |   |
| 10,97 | 1,803575724  | 3,5up   | H61979   |           | 0 |
| 10,10 | 1,801165243  | 3,5up   | AA485665 | EFNB3     |   |
| 9,05  | -2,626167497 | 3,5down | AA400292 | DAB2      |   |
