# Supplementary material
Source: PubMed Central journal article supplement (PMC1421501)
Supplement: nar_34_6_1745__2.pdf [file nar_34_6_1745__2.pdf]

## Nowak et al. Legend to Suppl. Figure 1

Fig. 1. Putative E2F-1 target genes do not respond to 4-OHT in parental SK-N-SH-EP cells.

A. Expression of newly identified E2F-1 target genes in parental SK-N-SH-EP and E2F-1-ER expressing 1A3 cells before and after treatment with 4-OHT. Quantitative RT-PCR was performed on RNA isolated from cells that had been treated for 12 hours with 200 nM 4-OHT or the solvent control ethanol.

B and C. Microarray analysis of untreated and 4-OHT-treated parental SK-N-SH-EP cells with RNA from the experiment described in Fig. 1A.

B. Comparison of fold changes in the expression of the 309 putative E2F-1 target genes (see supplemental data) in parental SK-N-SH-EP and 1A3 cells after treatment with 4-OHT. Please note that of the 309 genes differentially expressed in response to 4-OHT in 1A3 cells only 5 (1.6 %) were regulated more than 2-fold by 4-OHT in parental SK-N-SH-EP cells.

C. Comparison of changes in mean M values of 309 E2F-1 target genes in parental SK-N-SH-EP and E2F-1-ER expressing 1A3 cells after treatment with 4-OHT.
